# Supplementary material for: Validation of the postoperative Quality of Recovery-15 questionnaire after emergency surgery and association with quality of life at three months
Source: Springer Nature journal article supplement (doi:10.1007/s12630-024-02722-4), 2024-03-19

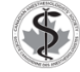

## ELECTRONIC SUPPLEMENTARY MATERIAL

### **Le Bescond V. *et al.*: Validation of the postoperative Quality of Recovery-15 questionnaire after emergency surgery and association with quality of life at three months**

*Disclaimer: Electronic Supplementary Material (ESM) is supplied by the authors for the benefit of readers. This feature is intended to provide additional information, context, and/or dimension to complement articles. Readers should be aware that unlike the main print manuscript, ESM may not undergo extensive peer review and typically is posted as supplied by the authors without editing, proofreading, accuracy checking, copyediting, or typesetting; it is published online only.*

#### TABLE OF CONTENTS

|                 |                                                                                                                                                    |
|-----------------|----------------------------------------------------------------------------------------------------------------------------------------------------|
| <b>eTable 1</b> | Different types of emergency surgical procedures                                                                                                   |
| <b>eTable 2</b> | Hospitalization status and POMS complication at 24 hr (H24) and 48 hr (H48) after surgery                                                          |
| <b>eTable 3</b> | Recovery status according to the patient at 24 (H24) and 48 hr (H48) after surgery                                                                 |
| <b>eTable 4</b> | Items responsiveness of the QoR-15 score between preoperative phase and 24 hr after surgery                                                        |
| <b>eTable 5</b> | Items responsiveness of the QoR-15 score between preoperative phase and 48 hr after surgery                                                        |
| <b>eTable 6</b> | Description of the domains of the EQ5D-3L quality of life scale at 3 months and association with the QoR-15 score completed at 24 hr after surgery |
| <b>eFig. 1</b>  | Heatmap representation of inter-item correlations for the QoR-15 at 24 hr after surgery                                                            |
| <b>eFig. 2</b>  | Heatmap representation of inter-item correlations for the QoR-15 at 48 hr after surgery                                                            |
| <b>eFig. 3</b>  | Scree plot representation of the QoR-15 score at 24 hr after surgery                                                                               |
| <b>eFig. 4</b>  | Scree plot representation of the QoR-15 score at 48 hr after surgery                                                                               |

**eTable 1** Different types of emergency surgical procedures

| <b>Types of surgical procedure</b> | <b>Overall<br/>N = 352 (%)</b> |
|------------------------------------|--------------------------------|
| Abdominal laparoscopy              | 58 (16)                        |
| Abdominal laparotomy               | 13 (4)                         |
| Abdominal wall surgery             | 23 (6)                         |
| Facial bone surgery                | 2 (1)                          |
| Facial plastic surgery             | 1 (0.3)                        |
| Tracheal endoscopy                 | 2 (1)                          |
| Other ENT procedures               | 5 (1)                          |
| Orthopedic lower limb procedures   | 96 (27)                        |
| Orthopedic upper limb procedures   | 67 (19)                        |
| Orthopedic tendon procedures       | 4 (1)                          |
| Proctology surgery                 | 12 (3)                         |
| Kidney                             | 4 (1)                          |
| Video thoracoscopy                 | 4 (1)                          |
| Urological endoscopy               | 30 (8)                         |
| Laparotomy for urinary tract       | 2 (1)                          |
| Vascular / Aorta                   | 1 (0.3)                        |
| Vascular / Lower limb              | 4 (1)                          |
| Vascular / Upper limb              | 1 (0.3)                        |
| Cervical spine                     | 2 (1)                          |
| Lumbar spine                       | 6 (2)                          |
| Other                              | 14 (4)                         |

ENT = Ear, Nose, Throat

**eTable 2** Hospitalization status and POMS complication at 24 hr (H24) and 48 hr (H48) after surgery

|                                              | Overall<br>N = 352 (%) |
|----------------------------------------------|------------------------|
| <b>Hospitalization status at H24</b>         |                        |
| Home                                         | 114 (32)               |
| Surgical ward                                | 212 (60)               |
| Medical ward                                 | 14 (4)                 |
| Intensive care unit                          | 12 (3)                 |
| <b>At least one POMS complication at H24</b> | 180 (51)               |
| <b>The main POMS Complications at H24</b>    |                        |
| Pulmonary                                    | 23 (6)                 |
| Infectious/sepsis                            | 87 (25)                |
| Renal                                        | 19 (5)                 |
| Gastrointestinal                             | 18 (5)                 |
| Cardiovascular                               | 8 (2)                  |
| Neurological                                 | 5 (1)                  |
| Wound complication                           | 3 (1)                  |
| Hematological                                | 8 (2)                  |
| Pain                                         | 99 (28)                |
| <b>Opioid consumption at H24 (mg)</b>        | 0.0 [0.0–6.0]          |
| <b>Hospitalization status at H48</b>         |                        |
| Home                                         | 192 (55)               |
| Surgical ward                                | 136 (39)               |
| Medical ward                                 | 14 (4)                 |
| Intensive care unit                          | 8 (2)                  |
| <b>At least one POMS complication at H48</b> | 99 (28)                |
| <b>The main POMS Complications at H48</b>    |                        |
| Pulmonary                                    | 8 (2)                  |
| Infectious/sepsis                            | 67 (19)                |
| Renal                                        | 9 (3)                  |
| Gastrointestinal                             | 11 (3)                 |
| Cardiovascular                               | 1 (0,3)                |
| Neurological                                 | 6 (2)                  |
| Wound complication                           | 3 (1)                  |
| Hematological                                | 7 (2)                  |
| Pain                                         | 18 (5)                 |
| <b>Opioid consumption at H48 (mg)</b>        | 0 [0.0–0.0]            |

**eTable 3** Recovery status according to the patient at 24 (H24) and 48 hr (H48) after surgery

|                                                        | Overall<br>N = 352 (%) |
|--------------------------------------------------------|------------------------|
| <b>7-point Likert scale for recovery status at H24</b> |                        |
| “Really worse”                                         | 1 (0.3)                |
| “Worse”                                                | 8 (2)                  |
| “Slightly worse”                                       | 18 (5)                 |
| “Same”                                                 | 57 (16)                |
| “Slightly better”                                      | 104 (29)               |
| “Better”                                               | 94 (27)                |
| “Really better”                                        | 70 (20)                |
| <b>“Good recovery” at H24</b>                          | 312 (89)               |
| <b>7-point Likert scale for recovery status at H48</b> |                        |
| “Really worse”                                         | 3 (1)                  |
| “Worse”                                                | 11 (3)                 |
| “Slightly worse”                                       | 12 (3)                 |
| “Same”                                                 | 35 (10)                |
| “Slightly better”                                      | 98 (28)                |
| “Better”                                               | 96 (27)                |
| “Really better”                                        | 94 (27)                |
| <b>“Good recovery” at H48</b>                          | 330 (5)                |

**eTable 4** Items responsiveness of the QoR-15 score between preoperative phase and 24 hr after surgery

| <b>QoR-15 item</b> | <b>Preoperative</b>   | <b>Postoperative (H24)</b> | <b>Mean change</b>            | <b>% Change from baseline</b> | <b>Cohen effect size</b> | <b>Standardized response mean</b> |
|--------------------|-----------------------|----------------------------|-------------------------------|-------------------------------|--------------------------|-----------------------------------|
| Q1                 | 9.21 (1.78)           | 9.27 (1.46)                | -0.02 (-0.3 to 0.19)          | -0.65                         | 0.01                     | 0.01                              |
| Q2                 | 6.72 (3.98)           | 7.1 (3.31)                 | -0.39 (-0.92 to 0.15)         | -5.67                         | 0.1                      | 0.07                              |
| Q3                 | 6.35 (2.8)            | 6.29 (2.55)                | 0.04 (-0.34 to 0.42)          | 0.94                          | 0.01                     | 0.01                              |
| Q4                 | 5.53 (3.08)           | 5.93 (2.94)                | -0.48 (-0.9 to -0.05)         | -7.27                         | 0.16                     | 0.11                              |
| Q5                 | 6.83 (3.66)           | 6.19 (3.41)                | 0.68 (0.16 to 1.17)           | 9.41                          | 0.19                     | 0.14                              |
| Q6                 | 9.15 (1.95)           | 9.29 (1.67)                | -0.11 (-0.35 to 0.15)         | -1.54                         | 0.06                     | 0.05                              |
| Q7                 | 9.12 (1.62)           | 9.46 (1.2)                 | -0.34 (-0.56 to -0.14)        | -3.74                         | 0.21                     | 0.17                              |
| Q8                 | 3.86 (3.78)           | 3.92 (3.25)                | -0.09 (-0.62 to 0.38)         | -1.54                         | 0.02                     | 0.02                              |
| Q9                 | 5.96 (3.27)           | 5.62 (2.81)                | 0.33 (-0.15 to 0.69)          | 5.67                          | 0.1                      | 0.08                              |
| Q10                | 6.06 (3.06)           | 6.41 (2.6)                 | -0.36 (-0.74 to 0.02)         | -5.74                         | 0.12                     | 0.09                              |
| Q11                | 4.57 (3.28)           | 5.22 (2.9)                 | -0.77 (-1.2 to -0.37)         | -14.13                        | 0.23                     | 0.18                              |
| Q12                | 5.72 (3.5)            | 7.17 (2.85)                | -1.5 (-1.95 to -1.07)         | -25.44                        | 0.43                     | 0.35                              |
| Q13                | 8.42 (2.94)           | 9.18 (2.13)                | -0.77 (-1.15 to -0.45)        | -9.05                         | 0.26                     | 0.22                              |
| Q14                | 5.54 (3.42)           | 7.52 (3.23)                | -2.02 (-2.48 to -1.52)        | -36                           | 0.59                     | 0.43                              |
| Q15                | 7.28 (3.27)           | 8.14 (3.06)                | -0.91 (-1.36 to -0.43)        | -11.78                        | 0.28                     | 0.2                               |
| <b>Total</b>       | <b>100.31 (22.99)</b> | <b>106.7 (22.66)</b>       | <b>-6.71 (-9.88 to -3.28)</b> | <b>-6.37</b>                  | <b>0.29</b>              | <b>0.21</b>                       |

**eTable 5** Items responsiveness of the QoR-15 score between preoperative phase and 48 hr after surgery

| <b>QoR-15 item</b> | <b>Preoperative</b> | <b>Postoperative (H24)</b> | <b>Mean change</b>        | <b>% Change from baseline</b> | <b>Cohen effect size</b> | <b>Standardized response mean</b> |
|--------------------|---------------------|----------------------------|---------------------------|-------------------------------|--------------------------|-----------------------------------|
| Q1                 | 9.21 (1.78)         | 9.45 (1.42)                | -0.25 (-0.49 to -0.03)    | -2.61                         | 0.14                     | 0.11                              |
| Q2                 | 6.72 (3.98)         | 7.8 (2.85)                 | -1.04 (-1.54 to -0.56)    | -16.12                        | 0.26                     | 0.21                              |
| Q3                 | 6.35 (2.8)          | 7.18 (2.32)                | -0.75 (-1.13 to -0.41)    | -12.97                        | 0.27                     | 0.22                              |
| Q4                 | 5.53 (3.08)         | 6.82 (2.66)                | -1.32 (-1.72 to -0.95)    | -23.45                        | 0.43                     | 0.35                              |
| Q5                 | 6.83 (3.66)         | 7.09 (2.93)                | -0.38 (-0.81 to 0.1)      | -3.82                         | 0.1                      | 0.08                              |
| Q6                 | 9.15 (1.95)         | 9.43 (1.54)                | -0.32 (-0.6 to -0.05)     | -3.08                         | 0.16                     | 0.12                              |
| Q7                 | 9.12 (1.62)         | 9.47 (1.17)                | -0.31 (-0.52 to -0.11)    | -3.85                         | 0.19                     | 0.16                              |
| Q8                 | 3.86 (3.78)         | 4.94 (3.07)                | -1.06 (-1.58 to -0.55)    | -27.69                        | 0.28                     | 0.21                              |
| Q9                 | 5.96 (3.27)         | 6.34 (2.64)                | -0.36 (-0.78 to 0.05)     | -6.33                         | 0.11                     | 0.09                              |
| Q10                | 6.06 (3.06)         | 7.03 (2.43)                | -0.9 (-1.3 to -0.46)      | -15.9                         | 0.29                     | 0.23                              |
| Q11                | 4.57 (3.28)         | 6.17 (2.7)                 | -1.63 (-2.04 to -1.21)    | -34.78                        | 0.5                      | 0.42                              |
| Q12                | 5.72 (3.5)          | 8.23 (2.43)                | -2.57 (-3 to -2.13)       | -44.04                        | 0.73                     | 0.6                               |
| Q13                | 8.42 (2.94)         | 9.53 (1.59)                | -1.11 (-1.45 to -0.73)    | -13.21                        | 0.38                     | 0.33                              |
| Q14                | 5.54 (3.42)         | 8.09 (2.88)                | -2.55 (-3 to -2.07)       | -46.36                        | 0.75                     | 0.57                              |
| Q15                | 7.28 (3.27)         | 8.39 (2.8)                 | -1.09 (-1.54 to -0.65)    | -15.21                        | 0.33                     | 0.26                              |
| Total              | 100.31 (22.99)      | 115.95 (22.28)             | -15.62 (-19.09 to -12.37) | -15.59                        | 0.68                     | 0.49                              |

**eTable 6** Description of the domains of the EQ5D-3L quality of life scale at three months and association with the QoR-15 score completed at 24 hr after surgery

|                                          | <b>Overall<br/>(N = 338)</b> | <b>Mean QoR-15<br/>score at 24 hours</b> | <b>P value</b> |
|------------------------------------------|------------------------------|------------------------------------------|----------------|
| <b>EQ5D – Mobility (%)</b>               |                              |                                          | 0.007          |
| No problem in walking                    | 248 (73)                     | 108.6 (23.3)                             |                |
| Some problems in walking                 | 84 (25)                      | 101.5 (21.2)                             |                |
| Confined to bed                          | 6 (2)                        | 96.7 (19.0)                              |                |
| <b>EQ5D – Self-care (%)</b>              |                              |                                          | 0.021          |
| No problems with self-care               | 288 (85)                     | 108.0 (22.8)                             |                |
| Some problems washing or dressing        | 38 (11)                      | 98.3 (21.7)                              |                |
| Unable to wash or dress                  | 12 (4)                       | 100.7 (24.6)                             |                |
| <b>EQ5D – Usual activities (%)</b>       |                              |                                          | 0.025          |
| No problems with performing activities   | 227 (67)                     | 108.6 (23.4)                             |                |
| Some problems with performing activities | 95 (28)                      | 103.0 (21.8)                             |                |
| Unable to perform activities             | 16 (5)                       | 100.4 (20.6)                             |                |
| <b>EQ5D – Pain/Discomfort (%)</b>        |                              |                                          | 0.043          |
| No pain or discomfort                    | 187 (55)                     | 109.1 (23.5)                             |                |
| Moderate pain or discomfort              | 137 (40)                     | 103.3 (22.3)                             |                |
| Extreme pain or discomfort               | 14 (4)                       | 105.3 (17.9)                             |                |
| <b>EQ5D – Anxiety/Depression (%)</b>     |                              |                                          | 0.005          |
| Not anxious or depressed                 | 280 (83)                     | 108.3 (22.7)                             |                |
| Moderately anxious or depressed          | 50 (15)                      | 97.9 (22.2)                              |                |
| Extremely anxious or depressed           | 8 (2)                        | 100.8 (24.7)                             |                |

**eFig. 1** Heatmap representation of inter-item correlations for the QoR-15 at 24 hr after surgery

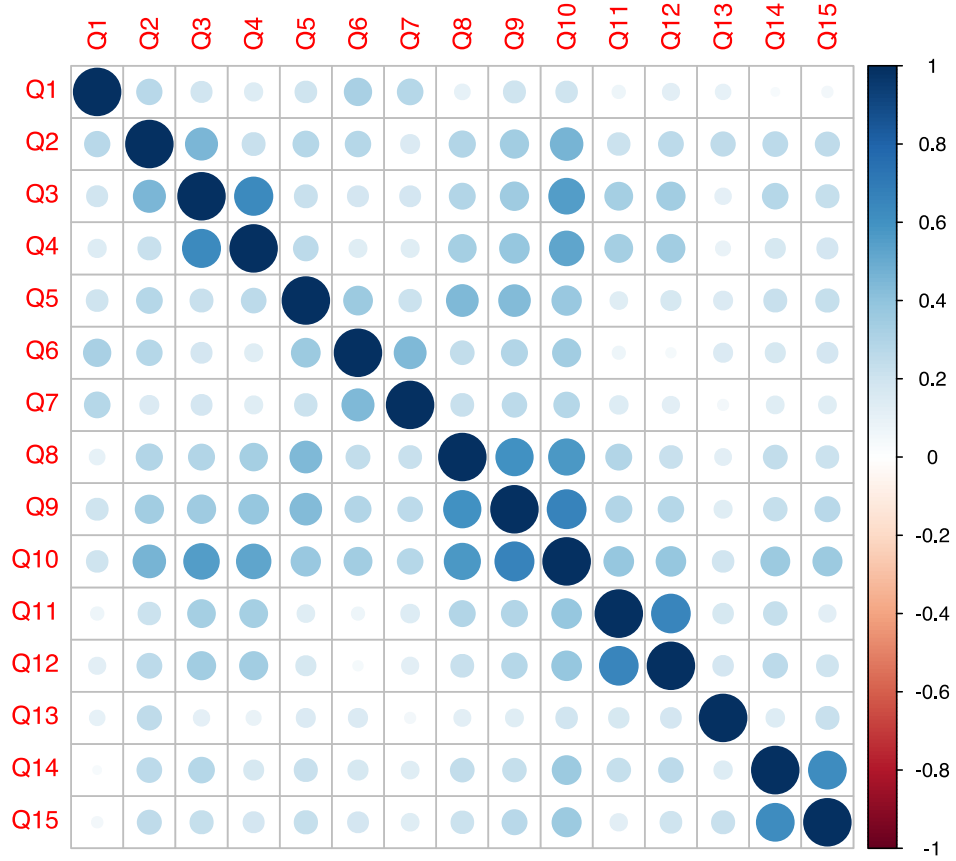



**eFig. 2** Heatmap representation of inter-item correlations for the QoR-15 at 48 hr after surgery

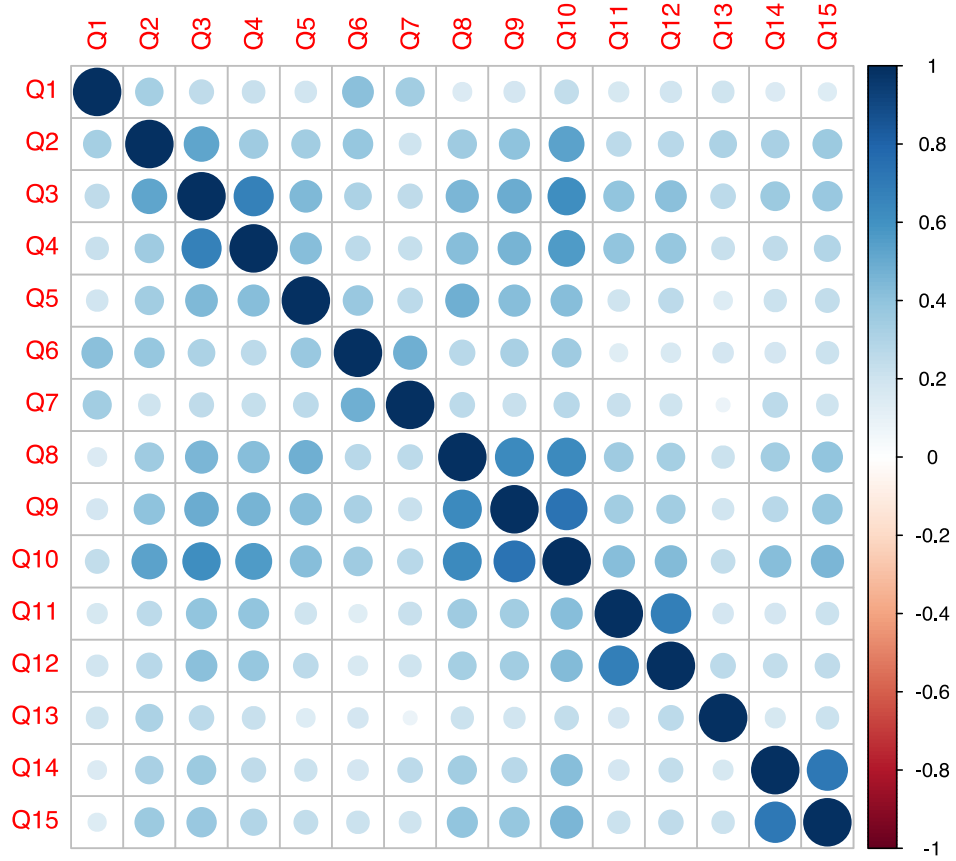

**eFig. 3**

Scree plot representation of the QoR-15 score at 24 hr after surgery

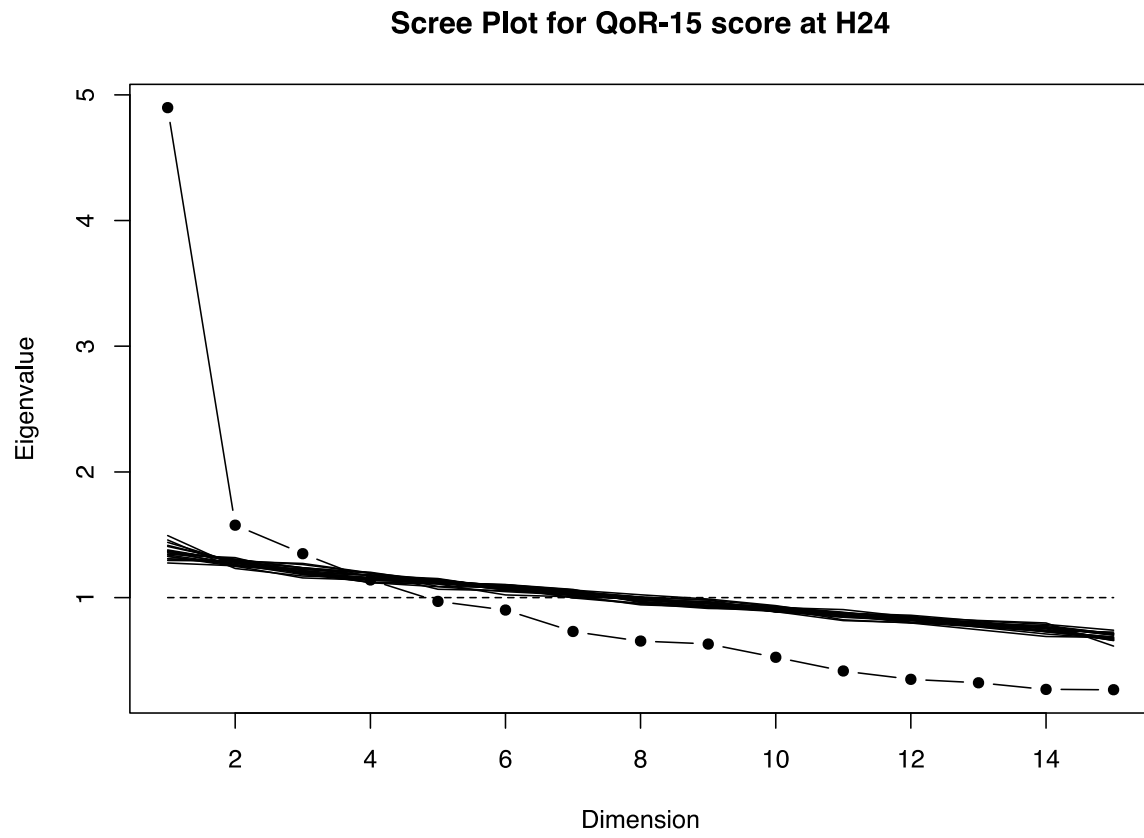

**eFig. 4** Scree plot representation of the QoR-15 score at 48 hr after surgery

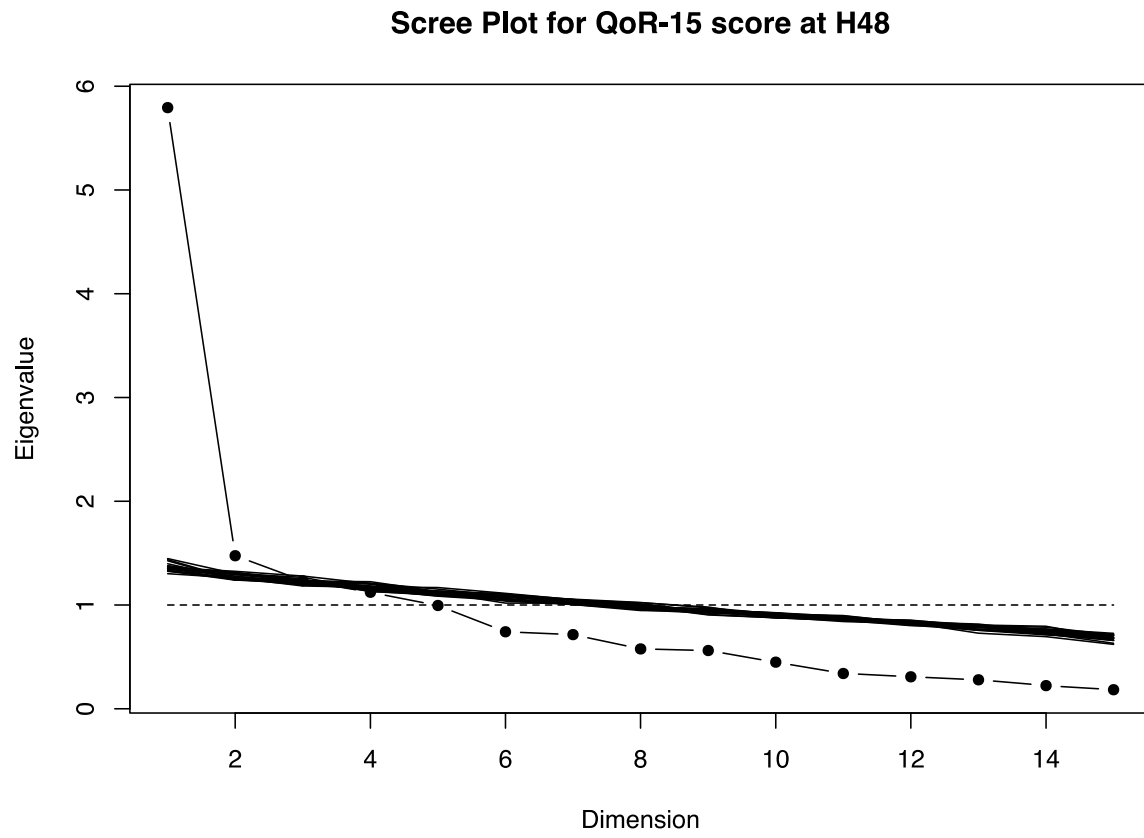

Supplement: MOESM1 [file 26876410]
